# Supplementary material for: Characterization of Beta-Lactamase and Fluoroquinolone Resistance Determinants in Escherichia coli, Klebsiella pneumoniae, and Pseudomonas aeruginosa Isolates from a Tertiary Hospital in Yola, Nigeria
Source: MDPI journal article supplement (doi:10.3390/tropicalmed8110500), 2023-11-16
Supplement: s1 [file s1]

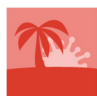

# Supplementary Materials: Characterization of Beta-Lactamase and Fluoroquinolone Resistance Determinants in *Escherichia coli*, *Klebsiella pneumoniae*, and *Pseudomonas aeruginosa* Isolates from a Tertiary Hospital in Yola, Nigeria

Diane E. Kawa <sup>1,\*</sup>, Isabella A. Tickler <sup>2</sup>, Fred C. Tenover <sup>3</sup> and Shuwaram A. Shettima <sup>4</sup>

**Table S1.** Beta-lactam and fluoroquinolone resistance phenotypes in *E. coli*, *K. pneumoniae* and *P. aeruginosa* isolates collected during Period 1. MLST, multi-locus sequence type; ESBL, extended-spectrum beta-lactamase; AST, antimicrobial susceptibility testing; MEM, meropenem; ETP, ertapenem; IPM, imipenem.

| ID    | Organism                      | MLST   | AST Phenotype |                        |                            |                           |
|-------|-------------------------------|--------|---------------|------------------------|----------------------------|---------------------------|
|       |                               |        | ESBL          | Carbapenemase          | Carbapenem Non-Susceptible | Fluoroquinolone Resistant |
| 15949 | <i>Escherichia coli</i>       | ST692  | None          | metallo-beta-lactamase | MEM/ETP/IPM                | Yes                       |
| 16020 | <i>Escherichia coli</i>       | ST692  | None          | metallo-beta-lactamase | MEM/ETP/IPM                | Yes                       |
| 16029 | <i>Escherichia coli</i>       | ST692  | None          | metallo-beta-lactamase | MEM/ETP/IPM                | Yes                       |
| 16032 | <i>Escherichia coli</i>       | ST692  | None          | metallo-beta-lactamase | MEM/ETP/IPM                | Yes                       |
| 16047 | <i>Klebsiella pneumoniae</i>  | ST147  | Yes           | None                   | MEM/ETP                    | Yes                       |
| 15958 | <i>Pseudomonas aeruginosa</i> | ST2935 | N/A           | None                   | No                         | No                        |
| 15964 | <i>Pseudomonas aeruginosa</i> | ST1203 | N/A           | metallo-beta-lactamase | MEM/IPM                    | Yes                       |
| 15965 | <i>Pseudomonas aeruginosa</i> | ST773  | N/A           | metallo-beta-lactamase | MEM/IPM                    | Yes                       |
| 15966 | <i>Pseudomonas aeruginosa</i> | ST1203 | N/A           | metallo-beta-lactamase | MEM                        | Yes                       |
| 15986 | <i>Pseudomonas aeruginosa</i> | ST654  | N/A           | metallo-beta-lactamase | MEM/IPM                    | Yes                       |
| 16014 | <i>Pseudomonas aeruginosa</i> | ST244  | N/A           | None                   | No                         | No                        |
| 16018 | <i>Pseudomonas aeruginosa</i> | ST654  | N/A           | metallo-beta-lactamase | MEM/IPM                    | Yes                       |
| 16048 | <i>Pseudomonas aeruginosa</i> | ST1555 | N/A           | None                   | No                         | No                        |

**Table S2.** Beta-lactam and fluoroquinolone resistant phenotypes in *E. coli*, *K. pneumoniae* and *P. aeruginosa* isolates collected during Period 2. MLST, multi-locus sequence type; ESBL, extended-spectrum beta-lactamase; AST, antimicrobial susceptibility testing; MEM, meropenem; ETP, ertapenem; IPM, imipenem.

| ID    | Organism                     | MLST                               | AST Phenotype |                        |                            |                           |
|-------|------------------------------|------------------------------------|---------------|------------------------|----------------------------|---------------------------|
|       |                              |                                    | ESBL          | Carbapenemase          | Carbapenem Non-Susceptible | Fluoroquinolone Resistant |
| 17757 | <i>Escherichia coli</i>      | Ambiguous (ST506, ST566)           | ESBL          | No                     | No                         | Yes                       |
| 17758 | <i>Escherichia coli</i>      | Ambiguous (ST27, ST129)            | No            | No                     | No                         | No                        |
| 17762 | <i>Escherichia coli</i>      | Ambiguous (ST27, ST129)            | No            | No                     | No                         | No                        |
| 17771 | <i>Escherichia coli</i>      | ST2                                | No            | No                     | No                         | No                        |
| 17772 | <i>Escherichia coli</i>      | ST2                                | ESBL          | No                     | No                         | Yes                       |
| 17773 | <i>Escherichia coli</i>      | ST83                               | No            | No                     | No                         | No                        |
| 17775 | <i>Escherichia coli</i>      | Inconclusive (ST721, ST662, ST472) | ESBL          | No                     | No                         | Yes                       |
| 17776 | <i>Escherichia coli</i>      | Inconclusive (ST466, ST210, ST132) | No            | No                     | No                         | Yes                       |
| 17781 | <i>Escherichia coli</i>      | ST692                              | ESBL          | serine-beta-lactamase  | ETP                        | Yes                       |
| 17782 | <i>Escherichia coli</i>      | ST471                              | ESBL          | No                     | No                         | Yes                       |
| 17786 | <i>Escherichia coli</i>      | ST132                              | No            | No                     | No                         | Yes                       |
| 17789 | <i>Escherichia coli</i>      | Inconclusive (ST500, ST437)        | No            | No                     | No                         | No                        |
| 17792 | <i>Escherichia coli</i>      | ST2632                             | ESBL          | No                     | No                         | Yes                       |
| 17795 | <i>Escherichia coli</i>      | ST86                               | ESBL          | No                     | No                         | Yes                       |
| 17796 | <i>Escherichia coli</i>      | Ambiguous (ST566, ST506)           | ESBL          | No                     | No                         | Yes                       |
| 17803 | <i>Escherichia coli</i>      | ST2                                | ESBL          | No                     | No                         | No                        |
| 17804 | <i>Escherichia coli</i>      | ST471                              | ESBL          | No                     | No                         | Yes                       |
| 17862 | <i>Escherichia coli</i>      | Inconclusive (ST500, ST437)        | No            | No                     | No                         | No                        |
| 17864 | <i>Escherichia coli</i>      | ST58                               | ESBL          | No                     | No                         | Yes                       |
| 17759 | <i>Klebsiella pneumoniae</i> | ST340                              | No            | Metallo-beta-lactamase | MEM/ETP/IPM                | Yes                       |
| 17765 | <i>Klebsiella pneumoniae</i> | ST86                               | No            | No                     | No                         | No                        |
| 17766 | <i>Klebsiella pneumoniae</i> | ST20                               | No            | No                     | No                         | No                        |
| 17767 | <i>Klebsiella pneumoniae</i> | ST392                              | No            | No                     | No                         | Yes                       |
| 17768 | <i>Klebsiella pneumoniae</i> | ST340                              | No            | Metallo-beta-lactamase | MEM/ETP/IPM                | Yes                       |
| 17770 | <i>Klebsiella pneumoniae</i> | ST86                               | No            | No                     | No                         | No                        |
| 17785 | <i>Klebsiella pneumoniae</i> | ST45                               | ESBL          | No                     | No                         | No                        |
| 17787 | <i>Klebsiella pneumoniae</i> | ST2632                             | No            | No                     | No                         | No                        |
| 17790 | <i>Klebsiella pneumoniae</i> | ST86                               | No            | No                     | No                         | No                        |
| 17793 | <i>Klebsiella pneumoniae</i> | ST661                              | No            | No                     | No                         | No                        |
| 17861 | <i>Klebsiella pneumoniae</i> | ST86                               | No            | No                     | No                         | No                        |
| 17863 | <i>Klebsiella pneumoniae</i> | ST340                              | No            | Metallo-beta-lactamase | MEM/ETP/IPM                | Yes                       |

|       |                               |                                 |    |                        |         |     |
|-------|-------------------------------|---------------------------------|----|------------------------|---------|-----|
| 17760 | <i>Pseudomonas aeruginosa</i> | ST274                           | No | No                     | MEM/IPM | No  |
| 17761 | <i>Pseudomonas aeruginosa</i> | Inconclusive<br>(nearest ST244) | No | No                     | MEM/IPM | No  |
| 17763 | <i>Pseudomonas aeruginosa</i> | ST773                           | No | Metallo-beta-lactamase | MEM/IPM | Yes |
| 17777 | <i>Pseudomonas aeruginosa</i> | ST773                           | No | Metallo-beta-lactamase | MEM/IPM | Yes |
| 17778 | <i>Pseudomonas aeruginosa</i> | ST773                           | No | Metallo-beta-lactamase | MEM/IPM | Yes |
| 17779 | <i>Pseudomonas aeruginosa</i> | ST773                           | No | Metallo-beta-lactamase | MEM/IMP | Yes |
| 17791 | <i>Pseudomonas aeruginosa</i> | ST773                           | No | Metallo-beta-lactamase | MEM/IMP | Yes |
| 17794 | <i>Pseudomonas aeruginosa</i> | ST773                           | No | Metallo-beta-lactamase | MEM/IMP | Yes |
